# Supplementary material for: A unified stochastic modelling framework for the spread of nosocomial infections
Source: PubMed Central journal article supplement (PMC6030628; doi:10.1098/rsif.2018.0060), 2018-06-13
Supplement: rsif20180060supp1.pdf [file rsif20180060supp1.pdf]

# Supplementary material: *A unified stochastic modelling framework for the spread of nosocomial infections*

Martín López-García<sup>1\*</sup>, Theodore Kypraios<sup>2</sup>

<sup>1</sup>*School of Mathematics, University of Leeds, LS2 9JT Leeds, UK*

<sup>2</sup>*School of Mathematical Sciences, University of Nottingham, NG7 2RD Nottingham, UK*

## Abstract

In this Supplementary Material, we discuss about how systems of equations in Ref. [1] can be represented in matrix form and iteratively solved. Moreover, we report here parameter values considered in case studies 1-5 in Ref. [1], obtained from Refs. [2, 3, 4, 5, 6], and summarise in Table S6 the function rates  $\lambda_j(i_1, \dots, i_M)$ ,  $\mu_j(i_1, \dots, i_M)$  and  $\delta(i_1, \dots, i_M)$  for these case studies.

## 1 Matrix-oriented solutions

### 1.1 Number of infections caused by an individual at compartment $j$ until he/she is removed or the outbreak is detected

The objective here is to compute probabilities

$$\nu_{(i_1, \dots, i_M)}^{(j)}(n) = \mathbb{P}(R_{(i_1, \dots, i_M)}^{(j)} = n), \quad n \geq 0,$$

by solving the systems of equations given by [1, Eq. (2.3)]. We can rewrite this system into a matrix equation of the form

$$\mathbf{D}^{(j)} \boldsymbol{\nu}^{(j)}(n) = \mathbf{e}^{(j)}(n), \quad (1)$$

where matrix  $\mathbf{D}^{(j)}$  is independent of the value  $n \geq 0$ , while column vectors  $\boldsymbol{\nu}^{(j)}(n)$  and  $\mathbf{e}^{(j)}(n)$  depend on this value. In particular,

$$\begin{aligned} (\mathbf{D}^{(j)})_{(i_1, \dots, i_M), (i_1, \dots, i_k-1, \dots, i_M)} &= \frac{1}{\theta_{(i_1, \dots, i_M)}} \mu_k(i_k \mathbf{1}_{k \neq j} \\ &+ (i_k - 1) \mathbf{1}_{k=j}), \quad 1 \leq k \leq M, \\ (\mathbf{D}^{(j)})_{(i_1, \dots, i_M), (i_1, \dots, i_k+1, \dots, i_M)} &= \frac{1}{\theta_{(i_1, \dots, i_M)}} \left( \lambda_k \right. \\ &+ \left. \sum_{l=1, l \neq j}^M \lambda_{lk} i_l + (i_j - 1) \lambda_{jk} \right) (N_k - i_k), \quad 1 \leq k \leq M, \\ (\mathbf{e}^{(j)}(n))_{(i_1, \dots, i_M)} &= \frac{1}{\theta_{(i_1, \dots, i_M)}} \left( \mathbf{1}_{n>0} \sum_{k=1}^M (N_k - i_k) \lambda_{jk} \right. \\ &\left. \times \nu_{(i_1, \dots, i_k+1, \dots, i_M)}^{(j)}(n-1) + \mathbf{1}_{n=0} (\mu_j + \delta(i_1, \dots, i_M)) \right). \end{aligned}$$

with  $i_j > 0$ . Moreover, we are storing in Eq. (1) probabilities  $\nu_{(i_1, \dots, i_M)}^{(j)}(n)$  in the column vector

$$\boldsymbol{\nu}^{(j)}(n) = \begin{pmatrix} \nu_{(0,0,\dots,0,0)}^{(j)}(n) \\ \nu_{(0,0,\dots,0,1)}^{(j)}(n) \\ \nu_{(0,0,\dots,0,2)}^{(j)}(n) \\ \vdots \\ \nu_{(0,0,\dots,0,N_M)}^{(j)}(n) \\ \nu_{(0,0,\dots,1,0)}^{(j)}(n) \\ \nu_{(0,0,\dots,1,1)}^{(j)}(n) \\ \nu_{(0,0,\dots,1,2)}^{(j)}(n) \\ \vdots \\ \nu_{(N_1, N_2, \dots, N_{M-1}, N_M)}^{(j)}(n) \end{pmatrix},$$

so that each row in this matrix system represents a state  $(i_1, \dots, i_M) \in \mathcal{C}$ , with  $i_j > 0$ . Due to the lexicographic order followed above when ordering these states by rows, each state  $(i_1, \dots, i_M)$  with  $i_j > 0$  corresponds to the  $\sum_{k=1}^M (1_{k \neq j} i_k + 1_{k=j} (i_j - 1)) \prod_{p=k+1}^M (1_{p \neq j} (N_p + 1) + 1_{p=j} N_p)^{th}$  row (*i.e.*, equation) in Eq. (1). Finally, since matrix  $\mathbf{D}^{(j)}$  is significantly sparse, for numerical results in [1, Section 3] we solve this system of linear equations by using the *scipy.sparse.linalg* Python package. This involves solving Eq. (1) for  $n = 0$ , and then iteratively solving it for values  $n \geq 1$  using probabilities  $\nu_{(i_1, \dots, i_M)}^{(j)}(n-1)$ , which are stored in column vector  $\boldsymbol{\nu}^{(j)}(n-1)$  previously computed.

\*Author for correspondence (m.lopezgarcia@leeds.ac.uk)

26 **1.2 Number of infections caused by an**  
 27 **individual at compartment  $j$ , among**  
 28 **individuals at compartment  $k$ , until**  
 29 **he/she is removed or the outbreak is**  
 30 **detected**

31 The objective here is to compute probabilities

$$\nu_{(i_1, \dots, i_M)}^{(j)}(k; n) = \mathbb{P}(R_{(i_1, \dots, i_M)}^{(j)}(k) = n), \quad n \geq 0,$$

32 by solving the systems of equations given by [1, Eq. (2.2)].  
 33 Again, we can construct and iteratively solve matrix sys-  
 34 tems of the form

$$\mathbf{D}^{(j)}(k) \boldsymbol{\nu}^{(j)}(k; n) = \mathbf{e}^{(j)}(k; n),$$

where

$$\begin{aligned} (\mathbf{D}^{(j)}(k))_{(i_1, \dots, i_M), (i_1, \dots, i_{l-1}, \dots, i_M)} &= \frac{1}{\theta_{(i_1, \dots, i_M)}} \mu_l (i_l \mathbf{1}_{l \neq j} \\ &+ (i_l - 1) \mathbf{1}_{l=j}), \quad 1 \leq l \leq M, \\ (\mathbf{D}^{(j)}(k))_{(i_1, \dots, i_M), (i_1, \dots, i_{l+1}, \dots, i_M)} &= \frac{1}{\theta_{(i_1, \dots, i_M)}} \left( \mathbf{1}_{l \neq k} (\lambda_l \right. \\ &+ \sum_{p=1}^M \lambda_{pl} i_p) (N_l - i_l) + \mathbf{1}_{l=k} (\lambda_l + \sum_{p=1, p \neq j}^M \lambda_{pl} i_p \\ &+ \lambda_{jl} (i_j - 1)) (N_l - i_l) \Big), \quad 1 \leq l \leq M, \\ (\mathbf{e}^{(j)}(k; n))_{(i_1, \dots, i_M)} &= \frac{1}{\theta_{(i_1, \dots, i_M)}} \left( \mathbf{1}_{n > 0} (N_k - i_k) \lambda_{jk} \right. \\ &\times \nu_{(i_1, \dots, i_k+1, \dots, i_M)}^{(j)}(k; n-1) + \mathbf{1}_{n=0} (\mu_j + \delta(i_1, \dots, i_M)) \Big), \end{aligned}$$

35 and where probabilities  $\nu_{(i_1, \dots, i_M)}^{(j)}(k; n)$  are stored in the  
 36 column vectors  $\boldsymbol{\nu}^{(j)}(k; n)$ , as in subsection 1.1 of this Sup-  
 37plementary Material.

38 **2 Parameter values for case studies**  
 39 **1-5**

40 In Tables S1-S5, we report parameter values considered  
 41 in case studies 1-5 in Ref. [1], directly obtained from  
 42 Refs. [2, 3, 4, 5, 6]. In Table S6, we summarise the  
 43 functional forms of rates  $\lambda_j(i_1, \dots, i_M)$ ,  $\mu_j(i_1, \dots, i_M)$  and  
 44  $\delta(i_1, \dots, i_M)$  for case studies 1-5, according to the cor-  
 45 responding model assumptions and model parameters de-  
 46 scribed in Ref. [1].

47 **References**

- 48 [1] López-García M, Kypraios T (2018) *A unified stochastic*  
 49 *modelling framework for the spread of nosoco-*  
 50 *mial infections*. Journal of the Royal Society Interface  
 51 20180060. <http://dx.doi.org/10.1098/rsif.2018.0060>.  
 52 [2] Artalejo, JR (2014) *On the Markovian approach for*  
 53 *modeling the dynamics of nosocomial infections*. Acta  
 54 Biotheoretica, 62: 15-34.

|           | Meaning                                 | Value         |
|-----------|-----------------------------------------|---------------|
| $N_p$     | Number of patients                      | 20            |
| $N_{HCW}$ | Number of HCWs                          | 3             |
| $\mu$     | Patient discharge rate                  | 0.1           |
| $\gamma$  | Patient detection rate                  | 0.1           |
| $\mu'$    | HCW hand-washing rate                   | 14            |
| $\beta$   | HCW-to-patient colonization rate        | $\frac{1}{6}$ |
| $\beta'$  | Patient-to-HCW contamination rate       | $\frac{1}{6}$ |
| $\sigma$  | Fraction of admitted patients colonized | 0.01          |

Table S1: Parameter values from Artalejo (2014) [2], for the spread of MRSA in an hypothetical intensive care unit. Time units: *days*. Case study 1

|                      | Meaning                                 | RICU  |
|----------------------|-----------------------------------------|-------|
| $N_P$                | Number of patients                      | 7     |
| $N_{HCW}$            | Number of HCWs                          | 14    |
| $N_V$                | Number of volunteers                    | 2     |
| $\varphi$            | Fraction of admitted patients colonized | 0.165 |
| $\frac{1}{\delta_U}$ | Length of stay, non-colonized patients  | 7     |
| $\frac{1}{\delta_C}$ | Length of stay, colonized patients      | 13    |
| $\eta$               | Hygienic level, HCW-patient             | 0.46  |
| $\xi$                | Hygienic level, volunteer-patient       | 0.23  |
| $\beta_{PH}$         | Patient-HCW contact rate                | 0.72  |
| $\beta_{PV}$         | Patient-volunteer contact rate          | 0.20  |
| $\gamma_H$           | HCW hand-washing rate                   | 24    |
| $\gamma_V$           | Volunteer hand-washing rate             | 12    |

Table S2: Parameter values from Wang et al. (2011) [3], for the spread of MRSA in the Respiratory Intensive Care Unit (RICU) at Beijing Tongren Hospital. Time units: *days*. Case study 2

|              | Meaning                                 | Value |
|--------------|-----------------------------------------|-------|
| $N_p$        | Number of patients                      | 20    |
| $N_s$        | Number of HCWs                          | 5     |
| $N_e$        | Number of surfaces                      | 100   |
| $\phi$       | Fraction of admitted patients colonized | 0.1   |
| $\gamma$     | Discharge rate, non-colonized patients  | 0.1   |
| $\gamma'$    | Discharge rate, colonized patients      | 0.05  |
| $\mu$        | Staff decontamination rate              | 24    |
| $\kappa$     | Surfaces decontamination rate           | 1     |
| $\beta_{sp}$ | Staff-to-patient colonization rate      | 0.3   |
| $\beta_{se}$ | Staff-to-surface contamination rate     | 2     |
| $\beta_{ps}$ | Patient-to-staff contamination rate     | 2     |
| $\beta_{pe}$ | Patient-to-surface contamination rate   | 2     |
| $\beta_{es}$ | Surface-to-staff contamination rate     | 2     |
| $\beta_{ep}$ | Surface-to-patient colonization rate    | 0.3   |

Table S3: Parameter values from Wolkewitz et al. (2008) [4], for an VRE outbreak in the onco-haematological unit at the University Medical Center Freiburg in Germany. Time units: *days*. Case study 3

- [3] Wang J, Wang L, Magal P, Wang Y, Zhuo J, Lu X, Ruan S (2011) *Modelling the transmission dynamics of*  
 55 *meticillin-resistant Staphylococcus aureus in Bei-*  
 56 *jing Tongren hospital*. Journal of Hospital Infection,  
 57 79: 302-308.  
 58  
 59  
 60 [4] Wolkewitz M, Dettenkofer M, Bertz H, Schumacher

|    |    | Rate function                                                           |                                                                                                     |                                                                                                                                                                                                                                                                                                                                                                                                                                                                                                                                                  |                                  |
|----|----|-------------------------------------------------------------------------|-----------------------------------------------------------------------------------------------------|--------------------------------------------------------------------------------------------------------------------------------------------------------------------------------------------------------------------------------------------------------------------------------------------------------------------------------------------------------------------------------------------------------------------------------------------------------------------------------------------------------------------------------------------------|----------------------------------|
| CS | M  | $\mu_j(i_1, \dots, i_M) = \mu_j i_j$                                    | $\lambda_j(i_1, \dots, i_M) = (N_j - i_j) \left( \lambda_j + \sum_{k=1}^M \lambda_{kj} i_k \right)$ | $\delta(i_1, \dots, i_M)$                                                                                                                                                                                                                                                                                                                                                                                                                                                                                                                        |                                  |
| 1  | 2  | $\mu_1 = (1 - \sigma)\mu, \mu_2 = \mu'$                                 | $\lambda_1 = \sigma\mu, \lambda_2 = 0$                                                              | $\lambda_{12} = \beta', \lambda_{21} = \beta$                                                                                                                                                                                                                                                                                                                                                                                                                                                                                                    | $\delta(i_1, i_2) = \gamma i_1$  |
| 2  | 3  | $\mu_1 = \delta_C(1 - \varphi), \mu_2 = \gamma_H$<br>$\mu_3 = \gamma_V$ | $\lambda_1 = \delta_U \varphi, \lambda_2 = 0$<br>$\lambda_3 = 0$                                    | $\lambda_{12} = \frac{1-\eta}{N_P} \beta_{PH}, \lambda_{13} = \frac{1-\xi}{N_P} \beta_{PV}$<br>$\lambda_{21} = \frac{1-\eta}{N_P} \beta_{PH}, \lambda_{23} = 0$<br>$\lambda_{31} = \frac{1-\xi}{N_P} \beta_{PV}, \lambda_{32} = 0$                                                                                                                                                                                                                                                                                                               | $\delta(i_1, i_2, i_3) = 0$      |
| 3  | 3  | $\mu_1 = \gamma'(1 - \phi), \mu_2 = \mu$<br>$\mu_3 = \kappa$            | $\lambda_1 = \gamma\phi, \lambda_2 = 0$<br>$\lambda_3 = 0$                                          | $\lambda_{12} = \frac{\beta_{ps}}{N_p}, \lambda_{13} = \frac{\beta_{pe}}{N_p}$<br>$\lambda_{21} = \frac{\beta_{sp}}{N_s}, \lambda_{23} = \frac{\beta_{se}}{N_s}$<br>$\lambda_{31} = \frac{\beta_{ep}}{N_e}, \lambda_{32} = \frac{\beta_{es}}{N_e}$                                                                                                                                                                                                                                                                                               | $\delta(i_1, i_2, i_3) = 0$      |
| 4  | 4  | $\mu_j = \nu(1 - p_C), 1 \leq j \leq 4$                                 | $\lambda_j = \nu p_C + \lambda, 1 \leq j \leq 4$                                                    | $\lambda_{jk} = \beta_{DR}, 1 \leq j \neq k \leq 4$<br>$\lambda_{jj} = \beta_{SR}, 1 \leq j \leq 4$                                                                                                                                                                                                                                                                                                                                                                                                                                              | $\delta(i_1, \dots, i_4) = 0$    |
| 5  | 11 | $\mu_j = \gamma, 1 \leq j \leq 4$<br>$\mu_j = \mu, 5 \leq j \leq 11$    | $\lambda_j = 0, 1 \leq j \leq 11$                                                                   | $\lambda_{51} = \lambda_{15} = \lambda_{62} = \lambda_{26} = \beta_{AP1}$<br>$\lambda_{73} = \lambda_{37} = \lambda_{84} = \lambda_{48} = \beta_{AP1}$<br>$\lambda_{91} = \lambda_{19} = \lambda_{92} = \lambda_{29} = \beta_{AP2}$<br>$\lambda_{10,3} = \lambda_{3,10} = \lambda_{10,4} = \lambda_{4,10} = \beta_{AP2}$<br>$\lambda_{11,1} = \lambda_{1,11} = \lambda_{11,2} = \lambda_{2,11} = \beta_{Peri}$<br>$\lambda_{11,3} = \lambda_{3,11} = \lambda_{11,4} = \lambda_{4,11} = \beta_{Peri}$<br>For others $(j, k)$ : $\lambda_{jk} = 0$ | $\delta(i_1, \dots, i_{11}) = 0$ |

Table S6: Functional forms for case studies 1-5 (CS 1-5)

|              | Meaning                                  | Value  |
|--------------|------------------------------------------|--------|
| $N_p$        | Number of patients                       | 9      |
| $\nu$        | Discharge rate                           | 0.1    |
| $p_C$        | Fraction of admitted patients colonized  | 0.01   |
| $\beta_{DR}$ | Cross-colonization rate, different rooms | 0.0238 |
| $\beta_{SR}$ | Cross-colonization rate, same room       | 0.0366 |
| $\lambda$    | Spontaneous colonization rate            | 0.0037 |

workers as potential superspreaders. Proceedings of the National Academy of Sciences, 106: 18420-18425. 71  
72

Table S4: Parameter values from López-García (2016) [5], for an MRSA outbreak in an intensive care unit with four rooms. Parameter values  $\nu$  and  $p_C$  from Artalejo et al. (2014) [2]. Time units: *days*. Case study 4

|                | Meaning                               | Value  |
|----------------|---------------------------------------|--------|
| $\beta_{AP1}$  | Patient-AP1 transmission rate         | 0.35   |
| $\beta_{AP2}$  | Patient-AP2 transmission rate         | 0.12   |
| $\beta_{Peri}$ | Patient-peripatetic transmission rate | 0.07   |
| $\mu$          | Hand-washing rate for all HCWs        | 1 - 24 |
| $\gamma^{-1}$  | Length of stay for all patients       | 10     |

Table S5: Parameter values from Temime et al. (2009) [6], for a bacterial outbreak in an hypothetical intensive-care unit. Time units: *days*. Case study 5

- 61 M, Huebner J (2008) *Environmental contamination as*  
62 *an important route for the transmission of the hospital*  
63 *pathogen VRE: modelling and prediction of classical*  
64 *interventions*. Infectious Diseases: Research and Treat-  
65 *ment*, 1.
- 66 [5] López-García M (2016) *Stochastic descriptors in an*  
67 *SIR epidemic model for heterogeneous individuals in*  
68 *small networks*. Mathematical Biosciences, 271: 42-61.
- 69 [6] Temime L, Opatowski L, Pannet Y, Brun-Buisson C,  
70 Boëlle PY, Guillemot D (2009) *Peripatetic health-care*
